# Supplementary material for: A Rationale for Drug Design Provided by Co-Crystal Structure of IC261 in Complex with Tubulin
Source: PubMed Central journal article supplement (PMC7916759; doi:10.3390/molecules26040946), 2021-02-10
Supplement: molecules-26-00946-s001.pdf [file molecules-26-00946-s001.pdf]

## Supplementary Materials:

**Table S1.** The CDOCKER Results of IC261

| Structure                                                                           | Number   | -DOCKER ENERGY | -DOCKER INTERACTION ENERGY |
|-------------------------------------------------------------------------------------|----------|----------------|----------------------------|
| 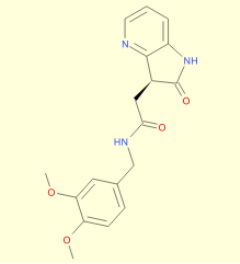   | IC261-85 | 28.3476        | 55.0063                    |
|   | IC261-67 | 27.677         | 53.243                     |
|  | IC261-7  | 19.0067        | 52.4687                    |
|  | IC261-83 | 29.8994        | 52.1593                    |
|  | IC261-59 | 33.5258        | 51.444                     |

|                                                                                     |          |         |         |
|-------------------------------------------------------------------------------------|----------|---------|---------|
| 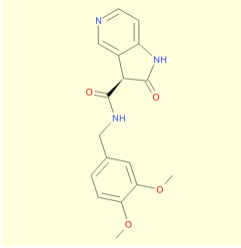   | IC261-71 | 24.6936 | 51.3824 |
|    | IC261-86 | 29.6497 | 51.3155 |
|    | IC261-84 | 28.8156 | 51.1278 |
|  | IC261    | 5.65048 | 50.7624 |
|  | IC261-37 | 22.5828 | 50.4947 |
|  | IC261-63 | 31.6164 | 50.3925 |

|                                                                                     |          |         |         |
|-------------------------------------------------------------------------------------|----------|---------|---------|
| 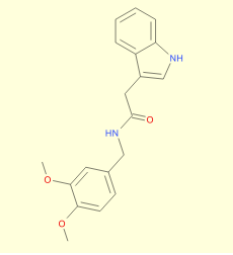   | IC261-75 | 37.0215 | 50.2725 |
|    | IC261-91 | 34.0401 | 50.1522 |
|    | IC261-35 | 18.2462 | 50.117  |
|  | IC261-69 | 19.3092 | 50.0616 |
|  | IC261-29 | 27.6935 | 50.0145 |
|  | IC261-21 | 21.1081 | 49.9331 |

|                                                                                     |          |         |         |
|-------------------------------------------------------------------------------------|----------|---------|---------|
| 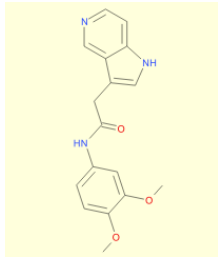   | IC261-93 | 31.6764 | 49.7824 |
|    | IC261-77 | 35.0064 | 49.525  |
|    | IC261-23 | 19.7973 | 49.3668 |
|  | IC261-72 | 27.4504 | 49.3175 |
|  | IC261-70 | 25.6619 | 49.0729 |
|  | IC261-5  | 14.9828 | 48.8917 |

|                                                                                     |          |         |         |
|-------------------------------------------------------------------------------------|----------|---------|---------|
| 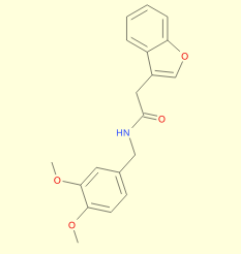   | IC261-73 | 36.5278 | 48.7393 |
|    | IC261-89 | 33.3856 | 48.5196 |
|   | IC261-51 | 14.6334 | 48.4993 |
|  | IC261-15 | 18.4478 | 48.3111 |
|  | IC261-53 | 13.2257 | 48.2912 |
|  | IC261-80 | 39.5839 | 48.2642 |

|                                                                                     |          |         |         |
|-------------------------------------------------------------------------------------|----------|---------|---------|
| 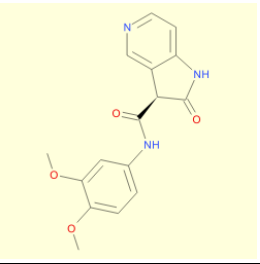   | IC261-55 | 15.9335 | 47.8623 |
|    | IC261-39 | 20.5313 | 47.7242 |
|    | IC261-87 | 22.1903 | 47.6339 |
|  | IC261-19 | 17.0567 | 47.3126 |
|  | IC261-25 | 28.9044 | 46.9493 |
|  | IC261-95 | 27.1931 | 46.8107 |

|                                                                                     |          |         |         |
|-------------------------------------------------------------------------------------|----------|---------|---------|
| 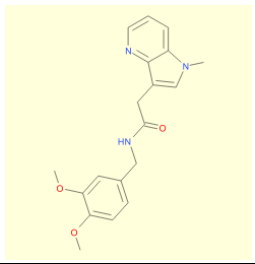   | IC261-79 | 27.7733 | 46.513  |
|    | IC261-4  | 22.2507 | 46.3597 |
|    | IC261-6  | 22.3052 | 46.3295 |
|  | IC261-28 | 33.5922 | 46.2708 |
|  | IC261-74 | 37.3355 | 46.076  |
|  | IC261-65 | 3.35754 | 46.0378 |

|                                                                                     |          |         |         |
|-------------------------------------------------------------------------------------|----------|---------|---------|
| 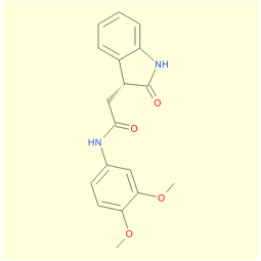   | IC261-3  | 15.7762 | 45.9616 |
|    | IC261-56 | 18.4919 | 45.9057 |
|   | IC261-31 | 23.2878 | 45.8359 |
|  | IC261-61 | 27.9934 | 45.8225 |
|  | IC261-68 | 25.3538 | 45.8084 |
|  | IC261-82 | 12.8172 | 45.7401 |



|                                                                                     |          |           |         |
|-------------------------------------------------------------------------------------|----------|-----------|---------|
| 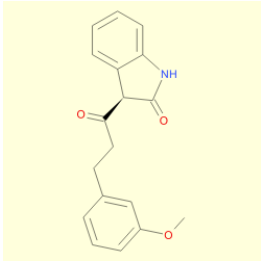   | IC261-36 | 26.2968   | 45.4971 |
|    | IC261-38 | 21.5559   | 45.4151 |
|    | IC261-57 | 27.9501   | 44.6775 |
|  | IC261-97 | -0.167742 | 44.5535 |
|  | IC261-81 | 3.78554   | 44.3331 |
|  | IC261-78 | 34.9892   | 44.2238 |

|                                                                                     |          |         |         |
|-------------------------------------------------------------------------------------|----------|---------|---------|
| 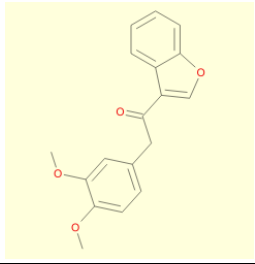   | IC261-9  | 25.1157 | 44.0386 |
|    | IC261-76 | 35.5865 | 43.9872 |
|   | IC261-40 | 22.5903 | 43.8156 |
|  | IC261-54 | 16.6774 | 43.7243 |
|  | IC261-50 | 2.76347 | 43.5349 |
|  | IC261-13 | 20.0579 | 43.5217 |

|                                                                                     |          |         |         |
|-------------------------------------------------------------------------------------|----------|---------|---------|
| 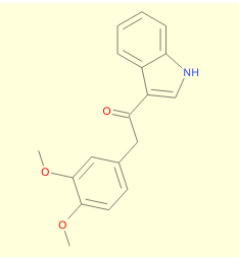   | IC261-11 | 22.9803 | 43.5167 |
|    | IC261-96 | 30.1652 | 43.4767 |
|    | IC261-8  | 17.2573 | 43.2851 |
|  | IC261-20 | 21.4302 | 42.9968 |
|  | IC261-94 | 27.4673 | 42.8824 |
|  | IC261-22 | 19.4972 | 42.8673 |

|                                                                                     |          |         |         |
|-------------------------------------------------------------------------------------|----------|---------|---------|
| 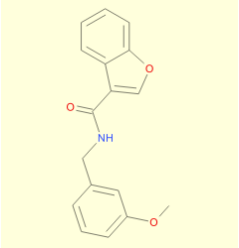   | IC261-58 | 31.4427 | 42.7167 |
|    | IC261-18 | 1.02852 | 42.5954 |
|    | IC261-92 | 31.0717 | 42.5683 |
|  | IC261-90 | 32.0684 | 42.2944 |
|  | IC261-88 | 23.9362 | 41.8312 |
|  | IC261-24 | 19.2852 | 41.5083 |

|                                                                                     |          |           |         |
|-------------------------------------------------------------------------------------|----------|-----------|---------|
| 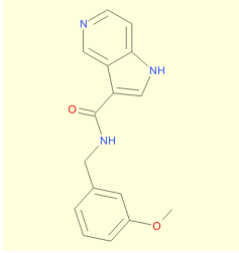   | IC261-62 | 30.4188   | 41.4802 |
|    | IC261-33 | -7.97166  | 41.4309 |
|    | IC261-64 | 26.9931   | 41.358  |
|   | IC261-60 | 29.783    | 41.1029 |
|  | IC261-66 | -0.726723 | 41.0067 |
|  | IC261-48 | 24.3173   | 40.8294 |

|                                                                                     |          |          |         |
|-------------------------------------------------------------------------------------|----------|----------|---------|
| 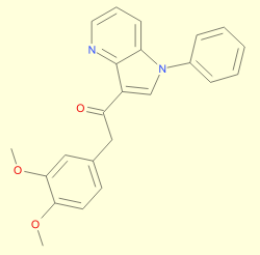   | IC261-17 | -9.05777 | 40.5744 |
|    | IC261-16 | 25.3145  | 40.0144 |
|    | IC261-30 | 24.8698  | 39.9366 |
|  | IC261-52 | 15.4301  | 39.9018 |
|  | IC261-41 | 19.0966  | 39.2201 |
|  | IC261-26 | 26.5189  | 39.1905 |

|                                                                                     |          |         |         |
|-------------------------------------------------------------------------------------|----------|---------|---------|
| 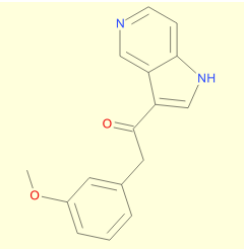   | IC261-14 | 25.4409 | 39.0956 |
|    | IC261-49 | -12.523 | 38.7287 |
|    | IC261-46 | 25.1365 | 38.1879 |
|   | IC261-45 | 17.655  | 38.143  |
|  | IC261-42 | 25.9982 | 37.8148 |
|  | IC261-44 | 23.4286 | 37.5918 |

|                                                                                     |          |         |         |
|-------------------------------------------------------------------------------------|----------|---------|---------|
| 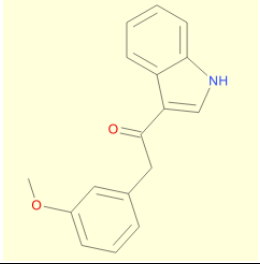   | IC261-12 | 26.4566 | 37.4763 |
|    | IC261-47 | 14.8729 | 37.4291 |
|   | IC261-10 | 27.1349 | 37.0368 |
|  | IC261-43 | 15.9403 | 37.016  |
|  | IC261-32 | 22.8603 | 36.9303 |
|  | IC261-27 | 16.4185 | 36.2056 |



|                                                                                   |          |           |         |
|-----------------------------------------------------------------------------------|----------|-----------|---------|
| 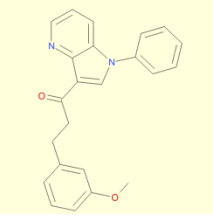 | IC261-34 | -11.9472  | 32.5087 |
|  | IC261-2  | -0.037182 | 31.95   |

### Establishment CDOCKER Docking Method

The CDOCKER module of Discovery Studio 2016 was used for docking. Firstly, the crystal of IC261-tubulin complex was imported into the software, the solvent water molecules were removed, and a group of  $\alpha$ -tubulin,  $\beta$ -tubulin and the IC261 molecule were retained. Tools-Macromolecules-Prepare Protein was selected to prepare the tubulin structure. Secondly, selected the IC261 molecule and pasted it into the new window named "Original-IC261" as the original crystal conformation. Selected Prepare Ligands to prepare the structure for the IC261 molecule. Thirdly, clicked IC261 and selected Tools-Receptor Ligand Interactions-Define and Edit Binding Site-From Current Selection to define the docking site. The prepared tubulin structure was checked as a receptor and IC261 as a ligand to implement docking in Tools-Receptor Ligand Interactions-Dock Ligand-CDOCKER.

The original crystal structure of the IC261 molecule conformation was copied into 10 conformation lists generated by redocking. Then selected the conformation and clicked Structure-RMSD-Set Reference. Selected all conformations and clicked Structure-RMSD-Heavy Atoms to calculate the root mean square variance (RMSD) between the docking conformations and the

original conformation. The superimposition of the original structure and the redocking conformations are shown in Figure S1 and the RMSD is shown in Figure S2.

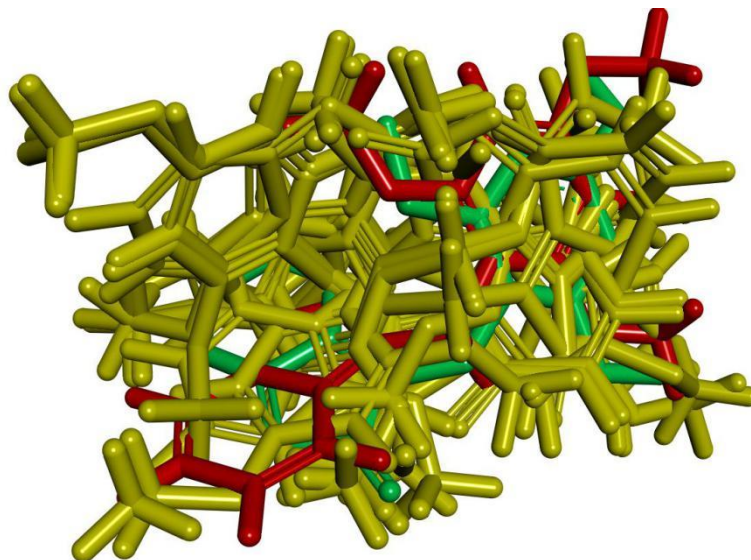

Figure S1. The superimposition of the original and the redocking conformations of IC261. The original conformation is shown in green; the optimal conformation is shown in red; and other conformations are shown in yellow.

Heavy Atom RMSD to Original-IC261 12

| Name               | Reference         | RMSD (Å) |
|--------------------|-------------------|----------|
| 261_2.1_refmac2 1  | Original-IC261 12 | 2.3645   |
| 261_2.1_refmac2 2  | Original-IC261 12 | 3.7589   |
| 261_2.1_refmac2 3  | Original-IC261 12 | 5.6993   |
| 261_2.1_refmac2 4  | Original-IC261 12 | 6.1975   |
| 261_2.1_refmac2 5  | Original-IC261 12 | 5.7047   |
| 261_2.1_refmac2 6  | Original-IC261 12 | 5.7432   |
| 261_2.1_refmac2 7  | Original-IC261 12 | 6.4057   |
| 261_2.1_refmac2 8  | Original-IC261 12 | 5.7875   |
| 261_2.1_refmac2 9  | Original-IC261 12 | 5.9292   |
| 261_2.1_refmac2 10 | Original-IC261 12 | 4.0373   |
| Original-IC261 12  | Original-IC261 12 | 0.0000   |

The following molecule(s) failed due to the number of atoms not matching the reference ligand

261\_2.1\_refmac2 1

Figure S2. The root mean square variance (RMSD) between the docking conformation and the original conformation.
